# Supplementary material for: A basic swimmer at low Reynolds number
Source: Royal Society of Chemistry journal article supplement (doi:10.1039/b812393d), 2008-11-17
Supplement: b812393d.pdf [file b812393d.pdf]

## SUPPLEMENTARY MATERIAL

### Additional considerations on the model and the data analysis

#### Scaling with $d$

We present here a simple argument for the scaling of the amplitude  $s$  with distance  $d$ , explaining the scaling seen for experiments and simulations in figure 3(d).

To estimate the  $d$ -dependency of the amplitude during a cycle, it is sufficient to describe the displacement of the central bead in one of the four sub-phases. We consider the simplified but physically equivalent situation of two interacting trapped beads at distance  $d$ . Initially the left bead, which represents the central bead in the experiment, is at rest and the right bead is out of its equilibrium position by a distance  $\epsilon$ , as it would be if in the instant the trap has been shifted. The initial conditions are thus  $x_L(0) = 0, x_R(0) = d$  and the equilibrium positions of the trapping potentials are  $x_{0,L} = 0; x_{0,R} = (d - \epsilon)$ . To a first approximation, (“zeroth order” in  $R/d$ ) the left bead is still, and the position of the right bead follows a simple relaxation law

$$x_R^{(0)}(t) = \epsilon \left( e^{-\frac{t}{\tau_0}} - 1 \right) + d \quad . \quad (1)$$

This unperturbed solution can be used to estimate (by the force balance with the fluid) the source of force  $F_R^{(0)} = -k_{\text{trap}}(x_R^{(0)} - d)$  applied by the right bead on the fluid during its relaxation. This can then be used into equation (1) of the main text for the left bead, giving

$$\tau_0 \dot{x}_L^{(1)} = x_L^{(1)} - \frac{3R}{2d} x_R^{(0)} \quad , \quad (2)$$

where  $x_R^{(0)}$  appears as an external perturbation, and we approximated the distance between the beads with  $d$ , which is justified in the limit of large

distances  $d \gg \epsilon$ . With this assumption, the problem becomes linear and the solution to order  $R/d$  can be calculated as

$$x_L^{(1)}(t) = \frac{3R\epsilon}{2d} \frac{t}{\tau_0} e^{-\frac{t}{\tau_0}} . \quad (3)$$

In turn, this solution could be used as a source for the equation for  $x_R$ , to obtain hierarchically the higher order contribution in  $R/d$  to its motion. The value of the peak of the central bead in the experiment  $s$  can be estimated by the maximum displacement of the left bead

$$x_{L,\max}^{(1)} = \frac{3R\epsilon}{2de} . \quad (4)$$

This argument implies that the leading order scaling of each peak in a cycle, and hence of  $s$ , is  $1/d$ . The argument has the advantage of showing how the hydrodynamic interaction tensor comes into play explicitly after a trap switches its position.

In the same linear approximation, the coupled equations (eq.1) from the main text can even be solved directly in a straightforward way, and the resulting maximum displacement is:

$$x_{L,\max} = \frac{3R\epsilon}{2d} \frac{1}{\left(1 + \frac{3R}{2d}\right)^{1+\frac{2d}{3R}}} , \quad (5)$$

which has the same behavior in the limit of large  $d/R$ .

Strictly speaking, this result is applicable in the regime  $\tau \gg \tau_0$ , in which the beads have the time to fully relax in the trap potentials. In the opposite limit,  $\tau \ll \tau_0$ , since the subcycle ends while the central bead is still moving away from the center of its trap, the maximum position can be estimated using the same solution,  $x_L^{(1)}(t)$ , by the position assumed by the central bead at the end of this subcycle, i.e. the instant  $t = \tau$ . Thus as

$$x_{L,\max}^{(1)} = \frac{3R\epsilon}{2d} \frac{\tau}{\tau_0} e^{-\frac{\tau}{\tau_0}} , \quad (6)$$

and the scaling with  $d$  is unaffected.

## Relating the observables $\delta_2$ and $\delta_{inv}$ with the mean force.

We summarise here how the procedure to relate the experimental data to the induced flow.

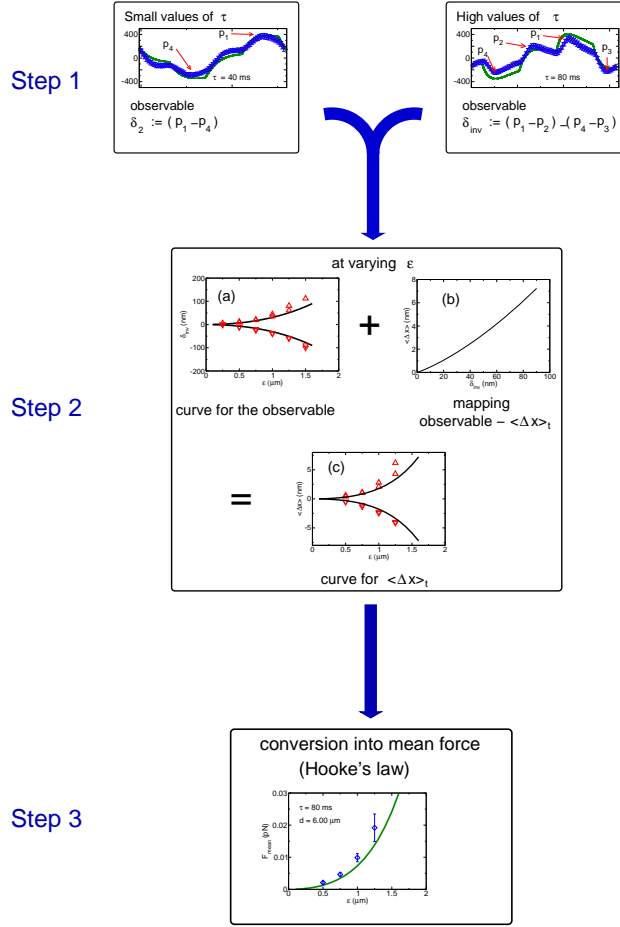

**Supplementary Figure S1: Converting observables into mean force.**

This scheme illustrates the procedure used to obtain the mean force from the experiments, by means of simulations. Step 1: Because of the different shapes of the mean cycles for different values of  $\tau$ , we define two different observables  $\delta_2$  and  $\delta_{inv}$  to quantify the asymmetry in the displacements for the central bead. The peaks which enter in the definitions are indicated with red arrows. Step 2: (a) We analyze the mean cycle of experiments and simulations, extracting each observable at varying  $\epsilon$ . We also calculate directly the temporal average  $\langle \Delta x \rangle$  for the position of the central bead. (b) Comparing these results and eliminating the dependence from  $\epsilon$ , we find that there exist a one to one mapping between each observable and the temporal average  $\langle \Delta x \rangle$ . (c) Using this relation the curve of each observable as a function of  $\epsilon$  can be converted into a curve of the mean position as a function of  $\epsilon$ . Step 3: using Hooke's law we convert the mean displacement into a mean force as a function of  $\epsilon$ .

## Scaling with $\tau$

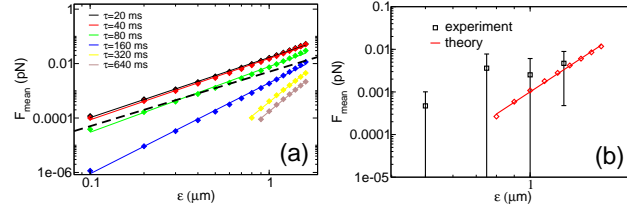

Supplementary Figure S2: **Scaling law for the mean force at varying  $\tau$ .** (a) Plot on log-log scale of the simulated mean displacement from the equilibrium position of the central bead. The curve is a power law with different exponents for different values of  $\tau$ . In our model the exponent varies, and increases monotonically for increasing  $\tau$ . In the limit of small  $\tau$  the mean displacement follows a power law with exponent close to 2 (dashed line), which resembles the behavior of the Golestanian swimmer. (b) Comparison between experimental and theoretical data for  $\tau = 320$  ms on log-log scale. Due to the large error bars on the experimental curve, the determination of the exponent from the experiment is subject to large uncertainties.

## Intrinsic Swimmer

Figure S3 shows a comparison of our model with simulations of an analogous intrinsic swimmer.

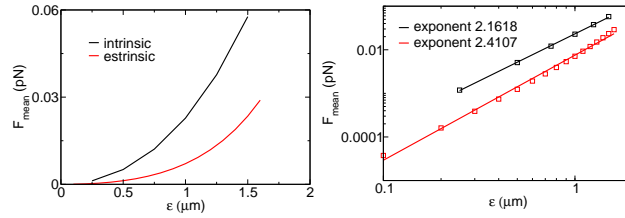

Supplementary Figure S3: **Comparison of the propulsive forces for extrinsic and intrinsic swimmers.** The extrinsic swimmer is studied experimentally and numerically in this work, whereas we can only study the intrinsic swimmer, actuated by two-state springs, numerically. The plot shows the mean force with varying  $\epsilon$ , for simulations of the two models, with parameters  $d = 6\mu\text{m}$   $\tau = 80\text{ms}$ . The difference between the two swimmers is only quantitative.
